# Supplementary material for: Low ice adhesion anti-icing coatings based on PEG release from mesoporous silica particle loaded SBS
Source: Royal Society of Chemistry journal article supplement (doi:10.1039/d2ma00661h), 2022-01-01
Supplement: d2ma00661h1.pdf [file d2ma00661h1.pdf]

**Electronic Supplementary Information (ESI)**

Low ice adhesion anti-icing coatings

based on PEG release

from mesoporous silica particles loaded SBS

*Aatif Ijaz, Annamaria Miko and A. Levent Demirel\**

Chemistry Department, Koç University, 34450 Sarıyer, Istanbul, Turkey

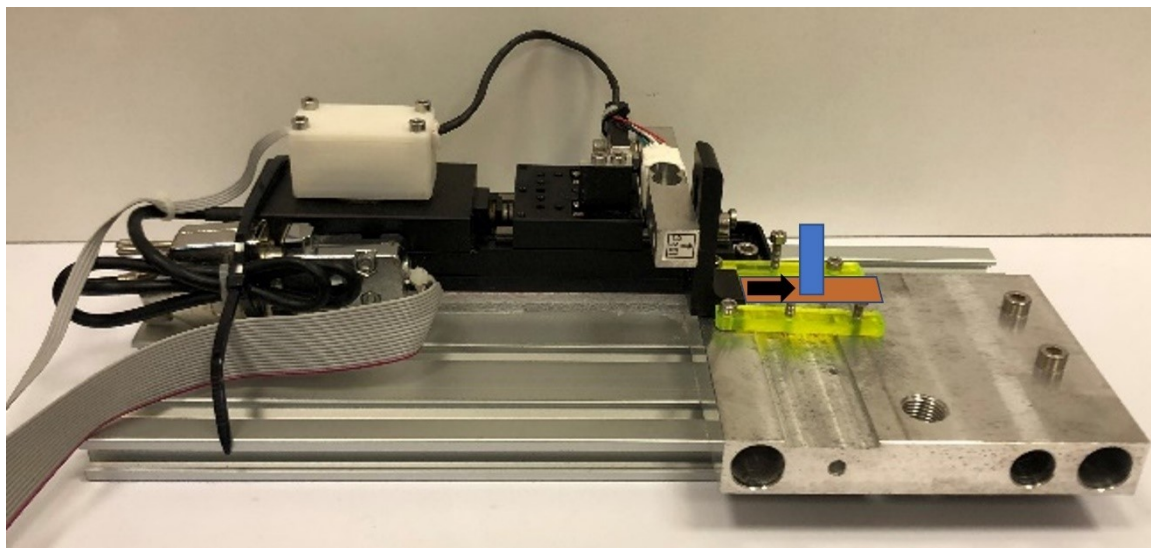

a)

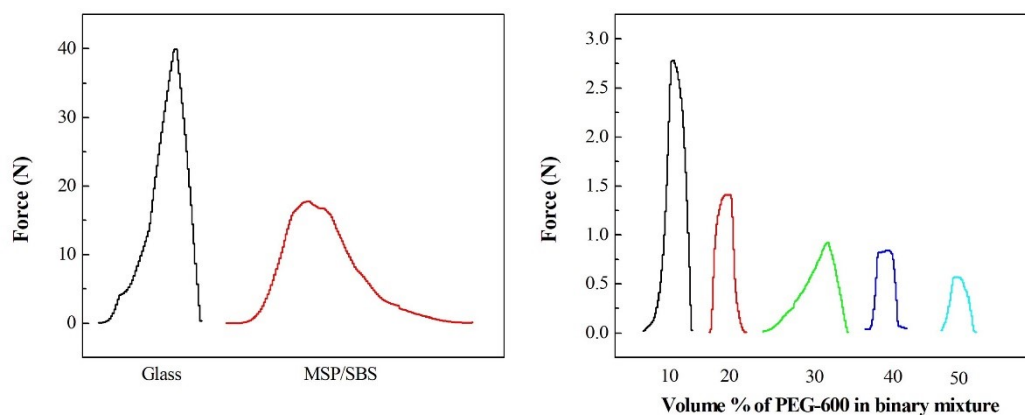

b)

**Fig. S1.** a) Ice adhesion measurement setup: the sample (brown), ice column (blue), direction in which the force is applied (black arrow). b) Force on the ice column measured on different samples: glass, unfilled MSP/SBS, PEG-filled MSP/SBS in 10%, 20%, 30%, 40%, 50% by volume PEG-600 solutions. The maximum force to detach the ice column was divided by the apparent cross-sectional area of the ice-composite interface to obtain the ice adhesion strength.

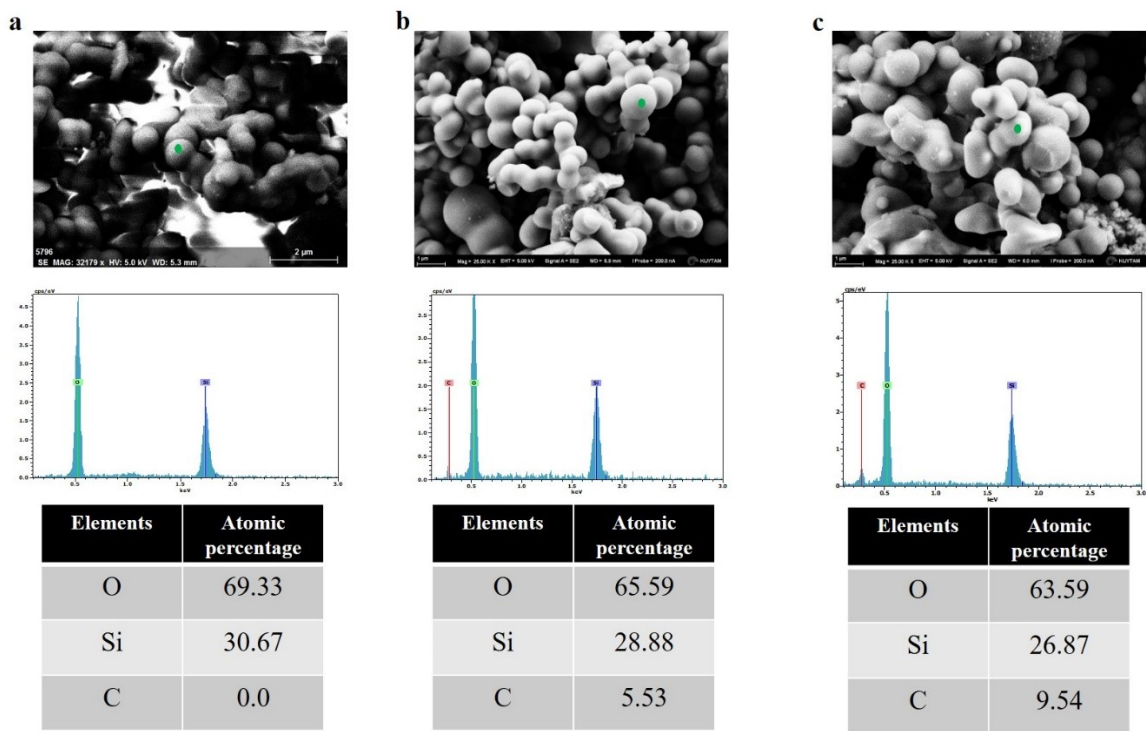

**Fig. S2.** SEM images and EDX analysis of unfilled and PEG-filled MSP: (a) unfilled MSP, (b) MSP filled in  $0.1 \text{ g mL}^{-1}$  PEG solution, (c) MSP filled in  $0.3 \text{ g mL}^{-1}$  PEG solution. The atomic percent of carbon increased with the filling solution concentration of PEG from 5.5 % at  $0.1 \text{ g mL}^{-1}$  filling concentration to 9.5 % at  $0.3 \text{ g mL}^{-1}$  filling concentration.

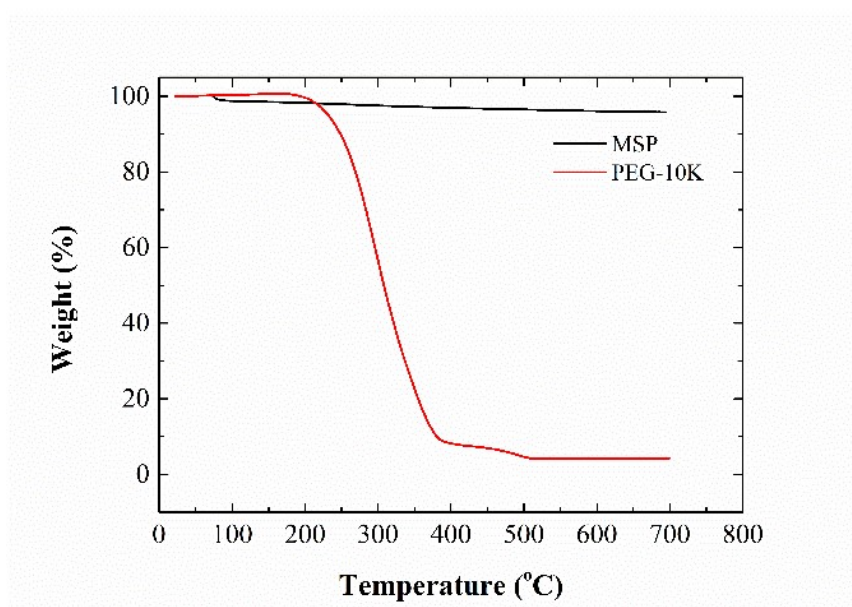

**Fig. S3.** TGA characterization of calcined MSP (black line) and PEG-10K (red line). Unfilled MSP showed a total mass loss of 4.5% due to physically adsorbed water.

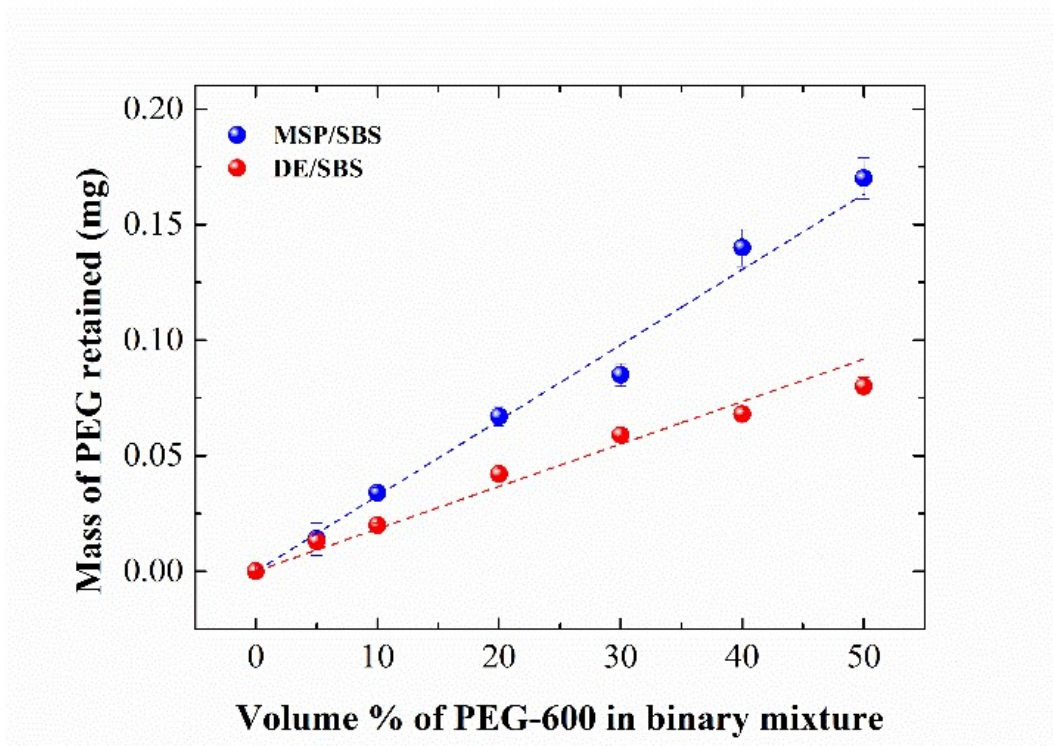

**Fig. S4.** Comparison of amount of PEG-600 retained in 1 mg of MSP/SBS and DE/SBS composites. MSP/SBS composites retained ~2 times more PEG-600 as compared to DE/SBS composites (30 % silica by weight in both) at the PEG-600 concentration of 50% by volume in the binary mixture.

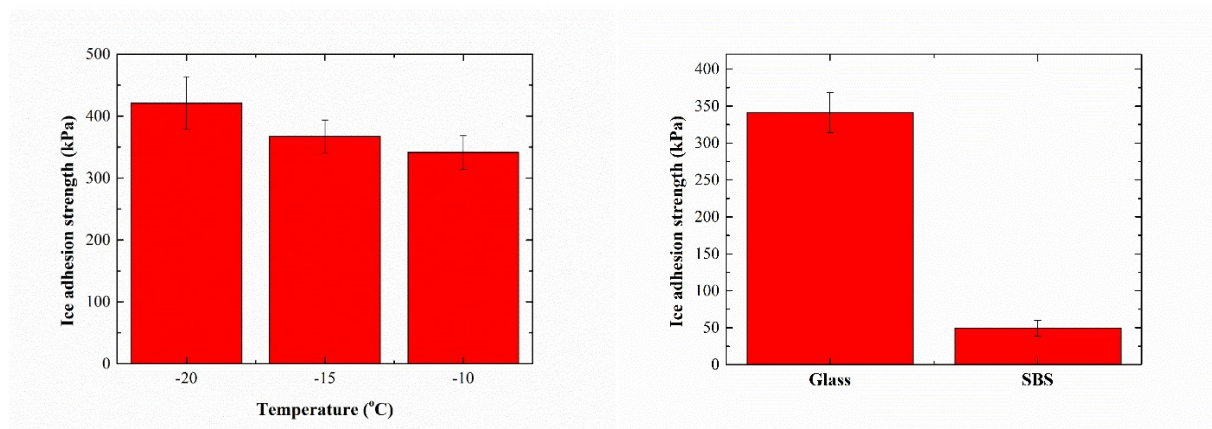

**Fig. S5.** a) Ice adhesion strength on uncoated glass slides as a function of measurement temperature, b) Comparison of ice adhesion strength of glass slides and SBS coatings at -10 °C.

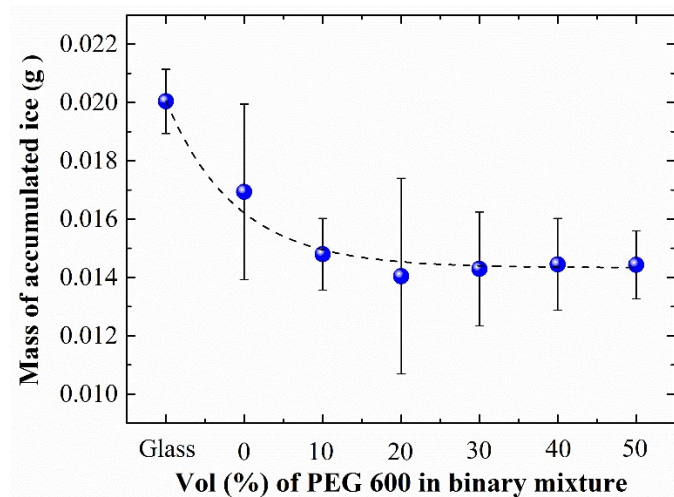

**Fig. S6.** The mass of accumulated frost induced by spraying water droplets at 0 °C onto inclined (by 45°) PEG-filled MSP/SBS composites at -10 °C as a function of PEG-600 concentration in the binary solvent in which the composites were filled.
